# Supplementary material for: Antimicrobial Susceptibility Profiles of Klebsiella pneumoniae Strains Collected from Clinical Samples in a Hospital in Southern Italy
Source: Hindawi journal article supplement (doi:10.1155/2024/5548434), 2024-04-25
Supplement: f1 [file 5548434.f1.pdf]

| <b>Age (Years)</b> | <b>2015</b> | <b>2016</b> | <b>2017</b> | <b>2018</b> | <b>2019</b> | <b>2020</b> |
|--------------------|-------------|-------------|-------------|-------------|-------------|-------------|
| <b>0-15</b>        | 7.1         | 9.1         | 5.0         | 15.3        | 6.2         | 6.1         |
| <b>16-30</b>       | 14.6        | 3.8         | 4.4         | 4.2         | 8.0         | 3.1         |
| <b>31-45</b>       | 11.2        | 11.1        | 13.0        | 8.8         | 9.3         | 10.1        |
| <b>46-60</b>       | 24.1        | 26.4        | 21.7        | 17.8        | 18.1        | 19.2        |
| <b>61-75</b>       | 26.5        | 29.1        | 31.5        | 31.0        | 35.3        | 35.2        |
| <b>76-95</b>       | 16.6        | 20.5        | 24.4        | 22.8        | 23.1        | 26.3        |
| <b>Total (n.)</b>  | 465         | 550         | 585         | 706         | 851         | 684         |

  

| <b>GENDER</b>     | <b>2015</b> | <b>2016</b> | <b>2017</b> | <b>2018</b> | <b>2019</b> | <b>2020</b> |
|-------------------|-------------|-------------|-------------|-------------|-------------|-------------|
| <b>Female</b>     | 39.4        | 50.4        | 56.8        | 51.7        | 48.5        | 52.3        |
| <b>Male</b>       | 60.6        | 49.6        | 43.2        | 48.3        | 51.5        | 47.7        |
| <b>Total (n.)</b> | 465         | 550         | 585         | 706         | 851         | 684         |

**Supplementary Table 1:** Distribution of cases (%) for gender and Age class

| <b>Department n.(%)</b>    | <b>2015</b> | <b>2016</b> | <b>2017</b> | <b>2018</b> | <b>2019</b> | <b>2020</b> | <b>TOT</b> |
|----------------------------|-------------|-------------|-------------|-------------|-------------|-------------|------------|
| Intensive Care Unit        | 119(25.6)   | 127(23.1)   | 108(18.5)   | 127(18.0)   | 137(16.1)   | 119(17.4)   | 737(19.2)  |
| Surgery                    | 38(8.2)     | 48(8.7)     | 79(13.5)    | 86(12.2)    | 141(16.6)   | 103(15.1)   | 495(12.9)  |
| Nephrology and Urology     | 63(13.5)    | 54(9.8)     | 61(10.4)    | 85(12.0)    | 122(14.3)   | 84(12.3)    | 469(12.2)  |
| Internal Medicine          | 45(9.7)     | 62(11.3)    | 58(9.9)     | 52(7.4)     | 74(8.7)     | 63(9.2)     | 354(9.2)   |
| Cardiology                 | 54(11.6)    | 61(11.1)    | 54(9.2)     | 39(5.5)     | 54(6.3)     | 58(8.5)     | 320(8.3)   |
| Hematology                 | 22(4.7)     | 36(6.5)     | 20(3.4)     | 36(5.1)     | 41(4.8)     | 43(6.3)     | 198(5.2)   |
| Neonatology                | 26(5.6)     | 31(5.6)     | 19(3.2)     | 67(9.5)     | 28(3.3)     | 23(3.4)     | 194(5.1)   |
| Anesthesia and Reanimation | 2(0.4)      | 18(3.3)     | 34(5.8)     | 62(8.8)     | 44(5.2)     | 19(2.8)     | 179(4.7)   |
| Neurology                  | 17(3.7)     | 20(3.6)     | 26(4.4)     | 22(3.1)     | 15(1.8)     | 34(5.0)     | 134(3.5)   |
| Infectious Diseases        | 19(4.1)     | 30(5.5)     | 14(2.4)     | 16(2.3)     | 19(2.2)     | 14(2.0)     | 112(2.9)   |
| Orthopedics                | 19(4.1)     | 6(1.1)      | 9(1.5)      | 14(2.0)     | 7(0.8)      | 8(1.2)      | 63(1.6)    |
| Gynecology                 | 7(1.5)      | 5(0.9)      | 11(1.9)     | 6(0.8)      | 13(1.5)     | 7(1.0)      | 49(1.3)    |
| Pediatrics                 | 5(1.1)      | 9(1.6)      | 6(1.0)      | 7(1.0)      | 9(1.1)      | 4(0.6)      | 40(1.0)    |
| Oncology                   | 4(0.9)      | 2(0.4)      | 4(0.7)      | 7(1.0)      | 4(0.5)      | 9(1.3)      | 30(0.8)    |
| ICU-COVID                  | NA          | NA          | NA          | NA          | NA          | 26(3.8)     | 26(0.7)    |
| Otolaryngology             | 0           | 0           | 3(0.5)      | 3(0.4)      | 2(0.2)      | 3(0.4)      | 11(0.3)    |
| Gynecology                 | 0           | 0           | 0           | 0           | 1(0.1)      | 2(0.3)      | 3(0.1)     |
| Others                     | 25(5.4)     | 41(7.5)     | 79(13.5)    | 77(10.9)    | 140(16.5)   | 65(9.5)     | 427(11.1)  |
| Total                      | 465         | 550         | 585         | 706         | 851         | 684         | 3841       |

**Supplementary Table 2:** Distribution of diagnostic materials by hospital department from 2015 to 2020. ICU—Intensive Care Unit, NA—non-applicable; Others included the ophthalmology unit, gastroenterology unit, Day hospital unit and outpatient clinics.
